# Supplementary material
Source: PubMed Central journal article supplement (PMC6367177)
Supplement: rspb20182132supp1.pdf [file rspb20182132supp1.pdf]

**Table S1.** Statistical results.

| Groups                                                            | n  | Test | H or W or U    | P        | Fig. |
|-------------------------------------------------------------------|----|------|----------------|----------|------|
| p/v, before (17 groups)                                           |    | K-W  | H=18.4 (df=19) | 0.50     | -    |
| a:b, before (12 groups)                                           |    | K-W  | H=15.0 (df=15) | 0.45     | -    |
| 4trials x 1d, p/v; control: before vs after training              | 22 | WCX  | W=31           | 0.0033   | 1a   |
| devalued: before vs after training                                | 20 | WCX  | W=69           | 0.189    | 1a   |
| After training: control vs devalued                               |    | M-W  | U=346          | 0.0031   | 1a   |
| 4trials x 1d, p/v; sucrose US, no water: before vs after training | 17 | WCX  | W=18           | 0.00038  | 1b   |
| sucrose US, water: before vs after training                       | 16 | WCX  | W=10           | 0.0049   | 1b   |
| water US, water: before vs after training                         | 19 | WCX  | W=66           | 0.41     | 1b   |
| sucrose US, after training: no water vs water                     |    | M-W  | U=161          | 0.38     | 1b   |
| 4trials x 3d, p/v; control: before vs after training              | 29 | WCX  | W=60           | 0.0036   | 2a   |
| devalued: before vs after training                                | 32 | WCX  | W=78           | 0.00013  | 2a   |
| after training: control vs devalued                               |    | M-W  | U=573.5        | 0.12     | 2a   |
| 4trials x 1d, p/v; control: before vs 3d after training           | 18 | WCX  | W=11           | 0.00084  | 2b   |
| devalued: before vs 3d after training                             | 20 | WCX  | W=123          | 0.52     | 2b   |
| 3d after training: control vs devalued                            |    | M-W  | U=313          | 0.00032  | 2b   |
| 4trials x 1d, a:b; control: before vs after training              | 37 | WCX  | W=277          | 0.000067 | 2c   |
| devalued: before vs after training                                | 34 | WCX  | W=88           | 0.96     | 2c   |
| After training: control vs devalued                               |    | M-W  | U=368.5        | 0.0055   | 2c   |
| 4trials x 3d, a:b; control: before vs after training              | 37 | WCX  | W=142          | 0.0023   | 2d   |
| devalued: before vs after training                                | 38 | WCX  | W=130          | 0.00084  | 2d   |
| after training: control vs devalued                               |    | M-W  | U=785.5        | 0.38     | 2d   |
| 4trials x 1d, p/v; saline: before vs after training               | 33 | WCX  | W=72           | 0.00023  | 4a   |
| epinastine: before vs after training                              | 28 | WCX  | W=169          | 0.45     | 4a   |
| after training: saline vs epinastine                              |    | M-W  | U=619          | 0.047    | 4a   |
| 4trial x 3d, p/v; saline: before vs after training                | 26 | WCX  | W=95           | 0.026    | 4b   |
| epinastine: before vs after training                              | 21 | WCX  | W=117          | 0.029    | 4b   |
| after training: saline vs epinastine                              |    | M-W  | U=313.5        | 0.39     | 4b   |
| 4trials x 1d,a:b; saline: before vs after training                | 47 | WCX  | W=205          | 0.00022  | 4c   |
| epinastine: before vs after training                              | 41 | WCX  | W=351          | 0.43     | 4c   |
| after training: saline vs epinastine                              |    | M-W  | U=1351         | 0.0024   | 4c   |

| Groups                                                                        | n  | Test | W or U  | P         | Fig. |
|-------------------------------------------------------------------------------|----|------|---------|-----------|------|
| 4trials x 3d,a:b; saline: before vs after training                            | 35 | WCX  | W=145   | 0.0090    | 4d   |
| epinastine: before vs after training                                          | 28 | WCX  | W=52    | 0.00082   | 4d   |
| after training: saline vs epinastine                                          |    | M-W  | U=525   | 0.73      | 4d   |
| 4trialx 1d, time to visit peppermint;<br>control: before vs after training    | 24 | WCX  | W=40    | 0.0035    | S1a  |
| devalued: before vs after training                                            | 24 | WCX  | W=133.5 | 0.90      | S1a  |
| After training: control vs devalued                                           |    | M-W  | U=90.5  | 0.00014   | S1a  |
| 4trials x 1d, time to visit vanilla;<br>control: before vs after training     | 24 | WCX  | W=176   | 0.47      | S1b  |
| devalued: before vs after training                                            | 24 | WCX  | W=216.5 | 0.18      | S1b  |
| After training: control vs devalued                                           |    | M-W  | U=213.5 | 0.25      | S1b  |
| 4trials x 1d, total time to visit odors;<br>control: before vs after training | 24 | WCX  | W=74    | 0.11      | S1c  |
| devalued: before vs after training                                            | 24 | WCX  | W=209   | 0.094     | S1c  |
| After training: control vs devalued                                           |    | M-W  | U=120.5 | 0.0017    | S1c  |
| no training p/v: before vs after water devaluation                            | 19 | WCX  | W=116   | 0.19      | S2   |
| 12 trials x 1d, p/v; control: before vs after training                        | 22 | WCX  | W=3     | 0.0000072 | S3a  |
| devalued: before vs after training                                            | 25 | WCX  | W=175   | 0.48      | S3a  |
| after training: control vs devalued                                           |    | M-W  | U=438   | 0.0010    | S3a  |
| 6trials x 2d, p/v; control: before vs after training                          | 22 | WCX  | W=14    | 0.00016   | S3b  |
| devalued: before vs after training                                            | 24 | WCX  | W=62.5  | 0.023     | S3b  |
| after training: control vs devalued                                           |    | M-W  | U=388   | 0.013     | S3b  |
| 12trials x 1d, a:b; saline: before vs after training                          | 21 | WCX  | W=43    | 0.037     | S4a  |
| epinastine: before vs after training                                          | 25 | WCX  | W=136   | 0.48      | S4a  |
| after training: saline vs epinastine                                          |    | M-W  | U=364   | 0.026     | S4a  |
| 6trials x 2d, a:b; saline: before vs after training                           | 21 | WCX  | W=37    | 0.015     | S4b  |
| epinastine: before vs after training                                          | 17 | WCX  | W=48    | 0.63      | S4b  |
| after training: saline vs epinastine                                          |    | M-W  | U=212   | 0.33      | S4b  |

p/v: peppermint odor was used as CS and vanilla odoe was used as control odor: a:b: either of the apple odor or banana odor was used as CS and the other as the control odor in a counterbalanced manner. K-W: Kruskal-Wallis test. WCX: Wilcoxon's test. M-W: Mann-Whitney test. P values were adjusted by Holm's method in the case of multiple comparisons. Experiments with the K-W test are described in the third paragraph of the Results section.

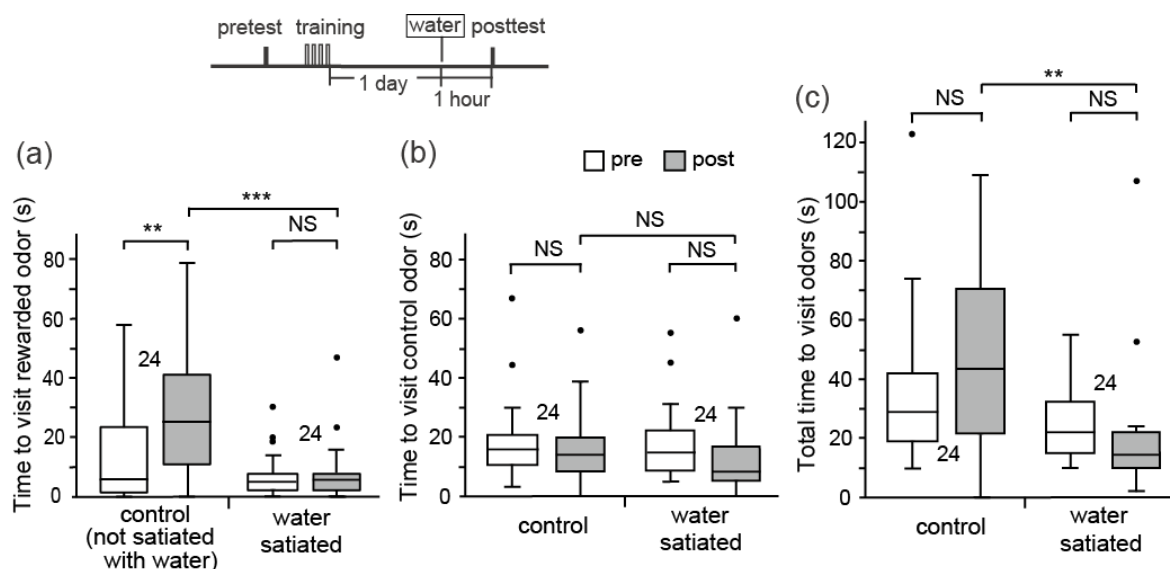

**Figure S1.** Effects of water satiation on responses to water-associated odors after standard training were evaluated by the time spent visiting odors. The time visiting rewarded (peppermint) odor (a) and control (vanilla) odor (b), and the total time visiting either odors (c) in the control (no water provided) group and water-satiated group shown in Fig. 1a are plotted as box plots. In this analysis, we included data from crickets that visited odor sources for less than 10 sec (two crickets for the control group and four crickets for the satiated group), which were not used for evaluation of odor preferences (see Methods). The results of statistical comparison of visiting time before and after training (WCX test) and between groups (M-W test) are shown as asterisks (\* \*  $p < 0.01$ ; \* \* \*  $p < 0.001$ ; NS  $p > 0.05$ , with the p values adjusted by Holm's method). The time visiting rewarded odor was significantly longer after training than that before training in the control group but not in the devalued group (a). On the other hand, the time visiting control odor did not significantly differ before and after training in both groups (b). The total time to visiting odors did not significantly differ before and after training in both groups, but between-group comparison showed that the total visiting time after training was significantly shorter in the devalued group than that in the control group (c). The results confirm that water satiation fully suppresses responses to water-associated odor but responses to control odors are less affected.

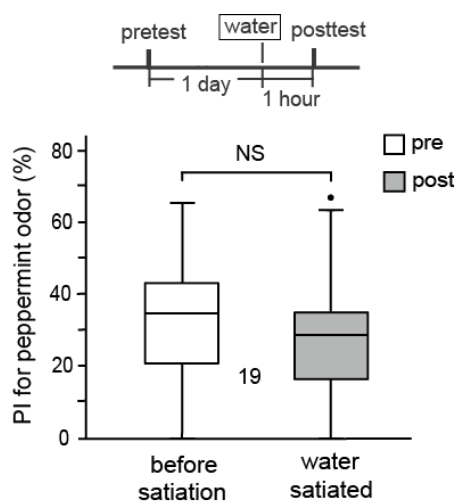

**Figure S2.** Water satiation does not alter odor preference in untrained crickets. Crickets in one group (n=19) were given odor preference test, and on the next day they were given water until stopped drinking, and one-hour later they were given the test again. Relative preferences between peppermint and vanilla odors, measured as the preference index (PI) for the peppermint odor, are shown as box plots. The odor preference after water satiation did not significantly differ from that before satiation (NS,  $p > 0.05$ , WCX test), indicating that water satiation does not alter odor preference in untrained crickets.

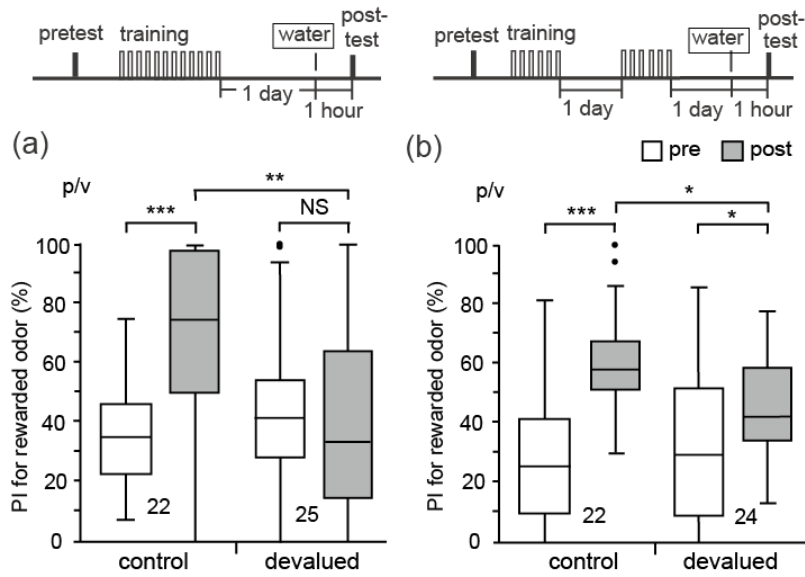

**Figure S3.** Evaluation of the amount of training necessary to make execution of the CR insensitive to reward devaluation. (a,b) Two groups were each subjected to a pre-test and then 12 trials x 1 day training (a), and another two groups of animals were each subjected to a pretest and then 6 trials x 2 days training (b). On the next day, crickets in one group were given water prior to the posttest and crickets in the other group were not given water. Relative preferences for the rewarded odor before (white box) and 1 day after training (gray box) are shown as box plots. The results of statistical comparison before and after conditioning (WCX test) and between groups (M-W test) are shown as asterisks (\*  $p < 0.05$ ; \*\*  $p < 0.01$ ; \*\*\*  $p < 0.001$ ; NS  $p > 0.05$ , with the p values adjusted by Holm's method).

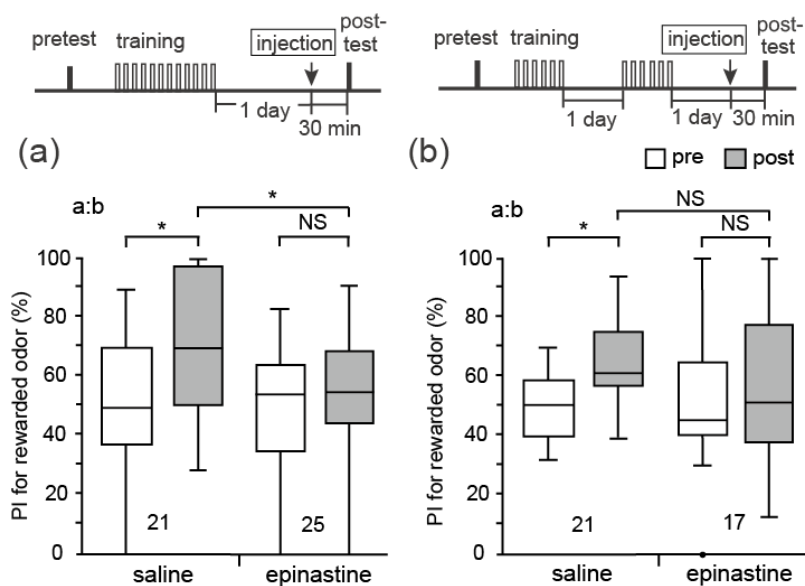

**Figure S4.** Evaluation of the amount of training necessary to make execution of the CR insensitive to epinastine. (*a,b*) Effects of epinastine on the CR were tested in the 12 trials x 1 day training group (*a*) and in the 6 trials x 2 days training group (*b*). Either apple odor or banana odor was used as CS and the other was used as the control odor. Relative preferences for the rewarded odor (PI) before (white box) and 1 day after training (gray box) are shown as box plots. The results of statistical comparison before and after conditioning (WCX test) and between groups (M-W test) are shown as asterisks (\*  $p < 0.05$ ; NS  $p > 0.05$ , with the  $p$  values adjusted by Holm's method).
