# Supplementary material
Source: PubMed Central journal article supplement (PMC6367177)
Supplement: rspb20182132supp2.pdf [file rspb20182132supp2.pdf]

Mizunami et al. Development of behavioral automaticity by extended Pavlovian training in an insect.  
 Supplementary DATA set

Fig. 1a PI for rewarded odor (%)

| Control group (n=22) |               | Devalued group (n=20) |                |
|----------------------|---------------|-----------------------|----------------|
| Control before       | Control after | Devalued before       | Devalued after |
| 0                    | 84.41558442   | 45.45454545           | 61.53846154    |
| 0                    | 60.60606061   | 33.33333333           | 26.08695652    |
| 23.07692308          | 73.33333333   | 40                    | 76.19047619    |
| 67.85714286          | 59.45945946   | 19.23076923           | 66.66666667    |
| 0                    | 34.11764706   | 8                     | 29.16666667    |
| 0                    | 26.19047619   | 0                     | 18.18181818    |
| 48.38709677          | 58.18181818   | 20.51282051           | 43.75          |
| 52.08333333          | 41.81818182   | 25                    | 0              |
| 78.37837838          | 82.29166667   | 0                     | 58.33333333    |
| 84.21052632          | 78.43137255   | 43.47826087           | 8.33333333     |
| 64.28571429          | 75.67567568   | 41.17647059           | 20             |
| 4.761904762          | 46.15384615   | 47.05882353           | 30             |
| 0                    | 39.28571429   | 4.166666667           | 10             |
| 45.08196721          | 64.22018349   | 59.375                | 53.33333333    |
| 73.80952381          | 81.08108108   | 0                     | 43.92523364    |
| 67.64705882          | 13.63636364   | 0                     | 50             |
| 7.692307692          | 63.76811594   | 24.13793103           | 64.28571429    |
| 20                   | 83.13253012   | 26.08695652           | 23.80952381    |
| 6.666666667          | 75.55555556   | 62.5                  | 43.39622642    |
| 79.16666667          | 100           | 20                    | 0              |
| 5.263157895          | 63.15789474   |                       |                |
| 56.09756098          | 59.57446809   |                       |                |

Fig. 1b

PI for rewarded odor (%)

| sucrose before | sucrose after | sucrose devalued before | sucrose devalued after | water devalued before | water devalued after |
|----------------|---------------|-------------------------|------------------------|-----------------------|----------------------|
| 48.93617021    | 100           | 22.58064516             | 100                    | 0                     | 27.27272727          |
| 62.06896552    | 27.5862069    | 24.32432432             | 82.05128205            | 22.85714286           | 43.75                |
| 9.523809524    | 0             | 8.333333333             | 48.14814815            | 50                    | 65                   |
| 0              | 46.66666667   | 29.54545455             | 100                    | 12.82051282           | 10                   |
| 36.36363636    | 31.70731707   | 52.27272727             | 79.36507937            | 0                     | 28.57142857          |
| 19.04761905    | 0             | 50                      | 54.54545455            | 0                     | 0                    |
| 35.29411765    | 66.66666667   | 30                      | 33.33333333            | 0                     | 35.29411765          |
| 13.63636364    | 65.11627907   | 61.11111111             | 100                    | 54.38596491           | 56.66666667          |
| 40.42553191    | 72.4137931    | 13.33333333             | 40                     | 43.47826087           | 50                   |
| 9.090909091    | 66.66666667   | 58.82352941             | 41.66666667            | 44                    | 37.93103448          |
| 0              | 57.77777778   | 0                       | 100                    | 20.58823529           | 47.91666667          |
| 18.33333333    | 56.8627451    | 41.66666667             | 58.33333333            | 25                    | 18.18181818          |
| 20             | 48            | 10                      | 18.51851852            | 44.44444444           | 55.55555556          |
| 0              | 46.2962963    | 61.36363636             | 50                     | 13.04347826           | 14.75409836          |
| 56.4516129     | 51.85185185   | 0                       | 81.81818182            | 37.93103448           | 21.21212121          |
| 21.42857143    | 75            | 0                       | 0                      | 22.58064516           | 65.75342466          |
| 20             | 77.14285714   | NA                      | NA                     | 54.54545455           | 25                   |
| NA             | NA            | NA                      | NA                     | 54.16666667           | 31.81818182          |
| NA             | NA            | NA                      | NA                     | 47.61904762           | 0                    |

Fig. 2a PI for rewarded odor (%)

| control before | control after | devalued before | devalued after |
|----------------|---------------|-----------------|----------------|
| 78.43137255    | 62.96296296   | 58.82352941     | 56.25          |
| 33.33333333    | 65.82278481   | 51.35135135     | 64.44444444    |
| 4              | 71.92982456   | 79.41176471     | 42.85714286    |
| 37.83783784    | 45.65217391   | 37.5            | 100            |
| 0              | 56            | 0               | 68.18181818    |
| 55.55555556    | 0             | 20              | 80.64516129    |
| 35.29411765    | 78.37837838   | 44.44444444     | 68.75          |
| 43.47826087    | 79.6875       | 40              | 67.56756757    |
| 73.07692308    | 71.42857143   | 54.54545455     | 73.33333333    |
| 36.84210526    | 63.07692308   | 14.28571429     | 51.85185185    |
| 94.64285714    | 37.31343284   | 25.64102564     | 0              |
| 45.09803922    | 59.61538462   | 16.66666667     | 70             |
| 16             | 44.44444444   | 38.88888889     | 84.61538462    |
| 57.57575758    | 69.23076923   | 50              | 63.63636364    |
| 33.33333333    | 62.5          | 33.33333333     | 70             |
| 73.80952381    | 52.17391304   | 8.695652174     | 100            |
| 13.33333333    | 39.13043478   | 63.63636364     | 20             |
| 4.347826087    | 11.86440678   | 24.3902439      | 29.41176471    |
| 45             | 58.73015873   | 32              | 73.91304348    |
| 0              | 47.61904762   | 72.4137931      | 100            |
| 0              | 69.11764706   | 20              | 55.26315789    |
| 0              | 68.18181818   | 50              | 98.33333333    |
| 16.66666667    | 54.23728814   | 51.61290323     | 72.61904762    |
| 0              | 100           | 50              | 72.61904762    |
| 44.44444444    | 10            | 45.45454545     | 71.95121951    |
| 14.81481481    | 36.36363636   | 17.94871795     | 92.95774648    |
| 0              | 72            | 35.48387097     | 51.61290323    |
| 38.46153846    | 58.24175824   | 41.17647059     | 51.35135135    |
| 21.42857143    | 100           | 53.84615385     | 69.35483871    |
|                |               | 10              | 30.3030303     |
|                |               | 42.10526316     | 53.84615385    |
|                |               | 61.29032258     | 69.23076923    |

Fig. 2b PI for rewarded odor (%)

| control before | control after | devalued before | devalued after |
|----------------|---------------|-----------------|----------------|
| 21.73913043    | 48.14814815   | 18.18181818     | 80             |
| 50             | 53.19148936   | 40              | 7.692307692    |
| 0              | 50            | 0               | 39.28571429    |
| 28.57142857    | 47.61904762   | 0               | 16.66666667    |
| 0              | 47.05882353   | 33.33333333     | 6.25           |
| 0              | 35.71428571   | 42.10526316     | 21.05263158    |
| 0              | 29.72972973   | 6.25            | 12.5           |
| 13.33333333    | 52.17391304   | 5.263157895     | 17.64705882    |
| 27.27272727    | 83.01886792   | 13.33333333     | 9.523809524    |
| 29.41176471    | 35            | 15.38461538     | 27.5862069     |
| 31.25          | 54.54545455   | 28.57142857     | 28.20512821    |
| 33.33333333    | 65.625        | 30.43478261     | 22.58064516    |
| 34.375         | 50            | 32.25806452     | 28             |
| 37.5           | 53.57142857   | 33.33333333     | 39.28571429    |
| 41.66666667    | 56.25         | 36.36363636     | 20.58823529    |
| 46.15384615    | 63.15789474   | 40              | 23.52941176    |
| 49.01960784    | 58.97435897   | 42.85714286     | 25.80645161    |
| 54.16666667    | 25            | 47.61904762     | 57.89473684    |
| NA             | NA            | 50              | 43.33333333    |
| NA             | NA            | 55              | 15.15151515    |

Fig. 2c PI for rewarded odor (%)

| control before | control after | devalued before | devalued after |
|----------------|---------------|-----------------|----------------|
| 60             | 73.91304348   | 31.70731707     | 30.85106383    |
| 45.45454545    | 56.75675676   | 23.91304348     | 10             |
| 50             | 55.55555556   | 89.65517241     | 35.29411765    |
| 60             | 55.26315789   | 50              | 32.96703297    |
| 25.80645161    | 100           | 44.82758621     | 42.10526316    |
| 37.03703704    | 54.16666667   | 86.66666667     | 100            |
| 16.17647059    | 59.375        | 63.63636364     | 53.19148936    |
| 48.64864865    | 65.625        | 31.94444444     | 13.63636364    |
| 55.88235294    | 61.53846154   | 25.80645161     | 10             |
| 70.27027027    | 75            | 57.14285714     | 80             |
| 69.23076923    | 48.64864865   | 50              | 50             |
| 59.375         | 44.68085106   | 43.90243902     | 55             |
| 9.523809524    | 0             | 50              | 58.82352941    |
| 79.16666667    | 81.08108108   | 25.58139535     | 38.46153846    |
| 33.33333333    | 84.375        | 71.01449275     | 57.57575758    |
| 40             | 100           | 35.29411765     | 50             |
| 51.1627907     | 75            | 40.90909091     | 74.19354839    |
| 54.90196078    | 60            | 37.14285714     | 40             |
| 0              | 39.13043478   | 30              | 61.53846154    |
| 34.61538462    | 71.01449275   | 50              | 58.33333333    |
| 47.05882353    | 65.51724138   | 11.11111111     | 76.92307692    |
| 0              | 24            | 57.57575758     | 36.84210526    |
| 27.5862069     | 73.17073171   | 45.45454545     | 58.33333333    |
| 30.64516129    | 67.9245283    | 34.21052632     | 72.72727273    |
| 0              | 66.66666667   | 26.13636364     | 63.63636364    |
| 83.33333333    | 50            | 67.44186047     | 50             |
| 65.45454545    | 83.33333333   | 33.33333333     | 59.09090909    |
| 44.44444444    | 43.24324324   | 52.17391304     | 0              |
| 23.80952381    | 54.05405405   | 41.79104478     | 20.3125        |
| 45.94594595    | 70            | 46.875          | 3.703703704    |
| 33.33333333    | 46.15384615   | 50              | 42.10526316    |
| 5.882352941    | 65.38461538   | 26.08695652     | 62.5           |
| 33.33333333    | 64.51612903   | 48.14814815     | 50             |
| 36.17021277    | 50            | 43.75           | 0              |
| 52.63157895    | 39.02439024   |                 |                |
| 48.88888889    | 64.9122807    |                 |                |
| 71.875         | 83.33333333   |                 |                |

Fig. 2d

PI for rewarded odor (%)

| control before | control after | devalued before | devalued after |
|----------------|---------------|-----------------|----------------|
| 26.74418605    | 78.94736842   | 89.79591837     | 100            |
| 41.66666667    | 85.18518519   | 56.25           | 51.85185185    |
| 44.82758621    | 50            | 50              | 56.52173913    |
| 48             | 62.06896552   | 58.33333333     | 47.05882353    |
| 34.54545455    | 65.2173913    | 14.28571429     | 66.66666667    |
| 51.02040816    | 76.19047619   | 24.3902439      | 81.81818182    |
| 70             | 51.72413793   | 26.66666667     | 57.14285714    |
| 43.47826087    | 100           | 37.87878788     | 100            |
| 38.70967742    | 61.76470588   | 59.61538462     | 54.54545455    |
| 45.71428571    | 80            | 42.85714286     | 100            |
| 58.06451613    | 54.54545455   | 63.63636364     | 70             |
| 54.09836066    | 75.55555556   | 76.92307692     | 46.80851064    |
| 69.56521739    | 50.98039216   | 17.64705882     | 93.75          |
| 62.06896552    | 69.23076923   | 9.523809524     | 92.85714286    |
| 60             | 77.10843373   | 72.36842105     | 68             |
| 69.23076923    | 53.19148936   | 57.57575758     | 69.33333333    |
| 67.74193548    | 73.7704918    | 50              | 30.76923077    |
| 19.04761905    | 68.08510638   | 80              | 66.66666667    |
| 13.33333333    | 82.35294118   | 30.76923077     | 52.05479452    |
| 0              | 63.41463415   | 65.78947368     | 74.41860465    |
| 16.94915254    | 69.11764706   | 32.0754717      | 78.57142857    |
| 36.36363636    | 75            | 41.66666667     | 68.83116883    |
| 20             | 40.22988506   | 60              | 40             |
| 60             | 25            | 50              | 79.41176471    |
| 44.44444444    | 70.43478261   | 46.2962963      | 70             |
| 48.07692308    | 60.97560976   | 81.25           | 70.27027027    |
| 73.33333333    | 50            | 56.52173913     | 72.72727273    |
| 82.75862069    | 66.66666667   | 59.64912281     | 80.95238095    |
| 56.52173913    | 57.72357724   | 35.48387097     | 72.72727273    |
| 50             | 33.33333333   | 63.26530612     | 62.12121212    |
| 50             | 51.85185185   | 43.75           | 56.41025641    |
| 38.46153846    | 69.73684211   | 61.29032258     | 61.53846154    |
| 58.33333333    | 75.51020408   | 38.29787234     | 85.71428571    |
| 68.18181818    | 81.13207547   | 25.53191489     | 80.32786885    |
| 0              | 44.82758621   | 63.93442623     | 66.66666667    |
| 82.35294118    | 50            | 34.66666667     | 64.70588235    |
| 75             | 95.83333333   | 64.28571429     | 63.33333333    |
|                |               | 46.875          | 60.97560976    |

Fig.4a

PI for rewarded odor (%)

| saline before | saline after | Epinastine before | Epinatine after |
|---------------|--------------|-------------------|-----------------|
| 69.23076923   | 89.79591837  | 68.18181818       | 51.61290323     |
| 32.25806452   | 66.66666667  | 14.28571429       | 29.41176471     |
| 10            | 13.33333333  | 42.85714286       | 45.45454545     |
| 25            | 68.75        | 2.564102564       | 80              |
| 57.57575758   | 53.65853659  | 50                | 64.28571429     |
| 48.8372093    | 75.38461538  | 45.45454545       | 46.42857143     |
| 73.68421053   | 36.36363636  | 10                | 27.27272727     |
| 32.55813953   | 47.36842105  | 30.76923077       | 54.54545455     |
| 0             | 16.66666667  | 50                | 0               |
| 54.54545455   | 33.33333333  | 42.85714286       | 30              |
| 45            | 42.85714286  | 64.44444444       | 40.54054054     |
| 27.27272727   | 76.19047619  | 61.36363636       | 43.47826087     |
| 0             | 64.70588235  | 15.90909091       | 25.92592593     |
| 0             | 33.33333333  | 0                 | 42.85714286     |
| 53.84615385   | 28.57142857  | 0                 | 37.5            |
| 0             | 17.24137931  | 60                | 30.76923077     |
| 36.66666667   | 47.05882353  | 60.60606061       | 21.21212121     |
| 28.57142857   | 59.45945946  | 57.14285714       | 15.38461538     |
| 39.02439024   | 41.66666667  | 1.438848921       | 20.68965517     |
| 70.96774194   | 100          | 68.57142857       | 46.66666667     |
| 20            | 55           | 52.5              | 50.66666667     |
| 63.63636364   | 80.55555556  | 30                | 43.33333333     |
| 28.57142857   | 25.86206897  | 24.3902439        | 50.68493151     |
| 69.41176471   | 61.40350877  | 49.46236559       | 55.17241379     |
| 62.96296296   | 79.06976744  | 36.11111111       | 71.73913043     |
| 0             | 93.33333333  | 43.75             | 49.38271605     |
| 48.88888889   | 72           | 44.89795918       | 46.875          |
| 0             | 35.71428571  | 36.11111111       | 55.17241379     |
| 0             | 50.84745763  |                   |                 |
| 0             | 46.66666667  |                   |                 |
| 28.30188679   | 82.75862069  |                   |                 |
| 35.71428571   | 57.77777778  |                   |                 |
| 42.85714286   | 70           |                   |                 |

Fig.4b PI for rewarded odor (%)

| saline before | saline after | epinatine before | epinatine after |
|---------------|--------------|------------------|-----------------|
| 81.25         | 57.14285714  | 37.93103448      | 85.71428571     |
| 33.33333333   | 75           | 38.70967742      | 64.51612903     |
| 27.27272727   | 61.9047619   | 22.22222222      | 65.27777778     |
| 57.14285714   | 27.45098039  | 40               | 55.26315789     |
| 8.33333333    | 51.42857143  | 25               | 85.71428571     |
| 0             | 42.37288136  | 8.823529412      | 79.06976744     |
| 34            | 56.25        | 5                | 50              |
| 0             | 70.58823529  | 19.04761905      | 59.25925926     |
| 10            | 60.60606061  | 42.85714286      | 68.18181818     |
| 7.692307692   | 48           | 27.27272727      | 52.38095238     |
| 60            | 63.15789474  | 36.36363636      | 64.86486486     |
| 46.66666667   | 53.19148936  | 29.16666667      | 74.74747475     |
| 3.703703704   | 25           | 31.66666667      | 100             |
| 0             | 45.23809524  | 46.15384615      | 65.51724138     |
| 65.2173913    | 77.77777778  | 90.0990099       | 0               |
| 68            | 45.45454545  | 66.66666667      | 57.14285714     |
| 46.26865672   | 78.37837838  | 60               | 88.23529412     |
| 0             | 65.38461538  | 23.68421053      | 16.66666667     |
| 16.36363636   | 60           | 69.56521739      | 47.22222222     |
| 33.33333333   | 44.82758621  | 60               | 28.57142857     |
| 75.67567568   | 33.33333333  | 48.97959184      | 31.25           |
| 7.5           | 71.42857143  |                  |                 |
| 59.09090909   | 59.45945946  |                  |                 |
| 42.85714286   | 91.42857143  |                  |                 |
| 63.26530612   | 44.70588235  |                  |                 |
| 85.48387097   | 57.89473684  |                  |                 |



Fig.4c

PI for rewarded odor (%)

| saline before | saline after | Epinastine before | Epinastine after |
|---------------|--------------|-------------------|------------------|
| 62.5          | 78.125       | 37.5              | 44.82758621      |
| 20            | 95           | 53.84615385       | 41.17647059      |
| 67.10526316   | 76.72413793  | 49.09090909       | 42.85714286      |
| 63.26530612   | 67.64705882  | 40                | 50               |
| 27.86885246   | 100          | 59.09090909       | 66.66666667      |
| 27.77777778   | 53.7037037   | 57.14285714       | 65.625           |
| 42.85714286   | 74.19354839  | 25.92592593       | 0                |
| 37.5          | 62.16216216  | 80                | 92.30769231      |
| 43.75         | 100          | 21.42857143       | 39.28571429      |
| 70            | 72.72727273  | 48.14814815       | 43.63636364      |
| 73.80952381   | 67.74193548  | 47.82608696       | 29.09090909      |
| 26.66666667   | 6.25         | 64                | 76.47058824      |
| 22.22222222   | 50           | 65.625            | 35.71428571      |
| 94.11764706   | 65           | 16.66666667       | 21.05263158      |
| 16.66666667   | 28.57142857  | 36.36363636       | 25.3968254       |
| 57.14285714   | 69.23076923  | 50                | 50               |
| 50            | 76.92307692  | 78.94736842       | 73.33333333      |
| 30.76923077   | 53.33333333  | 51.51515152       | 55.55555556      |
| 41.17647059   | 84.84848485  | 40                | 66.66666667      |
| 31.25         | 62.5         | 23.80952381       | 46.15384615      |
| 48.48484848   | 0            | 72.22222222       | 71.42857143      |
| 0             | 54.54545455  | 33.33333333       | 37.5             |
| 27.27272727   | 70           | 33.33333333       | 50               |
| 60            | 75           | 70                | 42.85714286      |
| 31.57894737   | 54.54545455  | 47.22222222       | 50               |
| 68.42105263   | 92.85714286  | 43.10344828       | 23.07692308      |
| 61.9047619    | 70           | 69.23076923       | 26.31578947      |
| 50            | 20.58823529  | 46.15384615       | 57.69230769      |
| 52.77777778   | 73.17073171  | 50                | 40               |
| 53.84615385   | 87.09677419  | 56.41025641       | 56.25            |
| 33.33333333   | 72.72727273  | 9.523809524       | 84.61538462      |
| 25            | 95.65217391  | 78.94736842       | 69.23076923      |
| 36.36363636   | 89.36170213  | 76.47058824       | 46.15384615      |
| 60.52631579   | 100          | 60                | 66.66666667      |
| 37.14285714   | 59.375       | 63.63636364       | 92.85714286      |
| 54.28571429   | 41.66666667  | 53.125            | 68.08510638      |
| 17.64705882   | 6.666666667  | 72.72727273       | 70.58823529      |
| 20            | 77.27272727  | 50                | 45.45454545      |
| 52.38095238   | 63.33333333  | 50                | 60               |
| 72.72727273   | 79.31034483  | 38.46153846       | 83.33333333      |
| 80            | 69.56521739  | 29.16666667       | 85.71428571      |
| 44.44444444   | 90           |                   |                  |
| 46.66666667   | 95.34883721  |                   |                  |
| 56.41025641   | 81.48148148  |                   |                  |
| 63.41463415   | 0            |                   |                  |
| 85.29411765   | 100          |                   |                  |
| 100           | 77.77777778  |                   |                  |

Fig.4d

PI for rewarded odor (%)

| saline before | saline after | epinastine before | epinatine after |
|---------------|--------------|-------------------|-----------------|
| 80            | 53.57142857  | 57.89473684       | 41.66666667     |
| 0             | 76.31578947  | 42.10526316       | 96.77419355     |
| 15.15151515   | 37.5         | 27.5862069        | 63.33333333     |
| 25            | 58.69565217  | 57.14285714       | 73.33333333     |
| 10.52631579   | 73.68421053  | 25                | 70.37037037     |
| 20            | 10.52631579  | 31.57894737       | 66.66666667     |
| 89.47368421   | 68.75        | 33.33333333       | 41.17647059     |
| 34.375        | 63.63636364  | 43.47826087       | 45.71428571     |
| 36.36363636   | 40.54054054  | 47.22222222       | 54.16666667     |
| 100           | 68.42105263  | 21.21212121       | 65.2173913      |
| 95.45454545   | 75           | 83.33333333       | 80              |
| 78.125        | 100          | 41.17647059       | 66              |
| 79.41176471   | 51.85185185  | 0                 | 50              |
| 50            | 81.81818182  | 63.63636364       | 72.22222222     |
| 50            | 85.41666667  | 69.56521739       | 83.33333333     |
| 22.72727273   | 10           | 51.85185185       | 66.66666667     |
| 38.7755102    | 84.84848485  | 33.33333333       | 52              |
| 73.07692308   | 68.18181818  | 36.36363636       | 83.33333333     |
| 74.41860465   | 63.33333333  | 47.05882353       | 90.47619048     |
| 52.94117647   | 73.07692308  | 54.54545455       | 42.30769231     |
| 51.61290323   | 100          | 71.42857143       | 60              |
| 62.5          | 42.85714286  | 50                | 64.86486486     |
| 28            | 60           | 47.36842105       | 80              |
| 46.42857143   | 57.89473684  | 43.75             | 72.5            |
| 70.58823529   | 100          | 100               | 63.63636364     |
| 52.63157895   | 79.24528302  | 55.55555556       | 60.71428571     |
| 61.53846154   | 88.88888889  | 70                | 88.52459016     |
| 55.55555556   | 80.64516129  | 37.5              | 58.97435897     |
| 41.66666667   | 60           |                   |                 |
| 65.71428571   | 82.35294118  |                   |                 |
| 0             | 67.74193548  |                   |                 |
| 50            | 37.14285714  |                   |                 |
| 87.5          | 67.34693878  |                   |                 |
| 72.22222222   | 81.81818182  |                   |                 |
| 28.57142857   | 58.33333333  |                   |                 |

| FigS1a<br>control<br>before | Time to visit rewarded odor (s) |                    |                   |    |
|-----------------------------|---------------------------------|--------------------|-------------------|----|
|                             | control after                   | devalued<br>before | devalued<br>after |    |
|                             | 0                               | 65                 | 5                 | 8  |
|                             | 0                               | 20                 | 5                 | 6  |
|                             | 3                               | 11                 | 6                 | 16 |
|                             | 19                              | 22                 | 5                 | 8  |
|                             | 0                               | 29                 | 2                 | 7  |
|                             | 0                               | 11                 | 0                 | 2  |
|                             | 15                              | 32                 | 8                 | 7  |
|                             | 25                              | 23                 | 4                 | 0  |
|                             | 58                              | 79                 | 0                 | 7  |
|                             | 16                              | 40                 | 20                | 2  |
|                             | 27                              | 28                 | 14                | 2  |
|                             | 1                               | 6                  | 8                 | 3  |
|                             | 0                               | 11                 | 1                 | 1  |
|                             | 55                              | 70                 | 19                | 8  |
|                             | 31                              | 60                 | 0                 | 47 |
|                             | 23                              | 3                  | 0                 | 11 |
|                             | 2                               | 44                 | 7                 | 9  |
|                             | 2                               | 69                 | 6                 | 5  |
|                             | 1                               | 34                 | 10                | 23 |
|                             | 38                              | 20                 | 2                 | 0  |
|                             | 1                               | 12                 | 3                 | 2  |
|                             | 23                              | 28                 | 8                 | 6  |
|                             | 2                               | 4                  | 2                 | 0  |
|                             | 9                               | 0                  | 30                | 0  |

FigS1b Time to visit control odor (s)

| control<br>before | control<br>after | devalued<br>before | devalued<br>after |
|-------------------|------------------|--------------------|-------------------|
| 30                | 12               | 6                  | 5                 |
| 30                | 13               | 10                 | 17                |
| 10                | 4                | 9                  | 5                 |
| 9                 | 15               | 21                 | 4                 |
| 18                | 56               | 23                 | 17                |
| 13                | 31               | 10                 | 9                 |
| 16                | 23               | 31                 | 9                 |
| 23                | 32               | 12                 | 18                |
| 16                | 17               | 55                 | 5                 |
| 3                 | 11               | 26                 | 22                |
| 15                | 9                | 20                 | 8                 |
| 20                | 7                | 9                  | 7                 |
| 19                | 17               | 23                 | 9                 |
| 67                | 39               | 13                 | 7                 |
| 11                | 14               | 45                 | 60                |
| 11                | 19               | 20                 | 11                |
| 24                | 25               | 22                 | 5                 |
| 8                 | 14               | 17                 | 16                |
| 14                | 11               | 6                  | 30                |
| 10                | 0                | 8                  | 23                |
| 18                | 7                | 18                 | 6                 |
| 18                | 19               | 5                  | 0                 |
| 8                 | 0                | 8                  | 2                 |
| 44                | 5                | 10                 | 0                 |

Fig.S1c

Total time to visit odors (sec)

| control,<br>before | control,<br>after | devalued,<br>before | davalued,<br>after |
|--------------------|-------------------|---------------------|--------------------|
| 30                 | 77                | 11                  | 13                 |
| 30                 | 33                | 15                  | 23                 |
| 13                 | 15                | 15                  | 21                 |
| 28                 | 37                | 26                  | 12                 |
| 18                 | 85                | 25                  | 24                 |
| 13                 | 42                | 10                  | 11                 |
| 31                 | 55                | 39                  | 16                 |
| 48                 | 55                | 16                  | 18                 |
| 74                 | 96                | 55                  | 12                 |
| 19                 | 51                | 46                  | 24                 |
| 42                 | 37                | 34                  | 10                 |
| 21                 | 13                | 17                  | 10                 |
| 19                 | 28                | 24                  | 10                 |
| 122                | 109               | 32                  | 15                 |
| 42                 | 74                | 45                  | 107                |
| 34                 | 22                | 20                  | 22                 |
| 26                 | 69                | 29                  | 14                 |
| 10                 | 83                | 23                  | 21                 |
| 15                 | 45                | 16                  | 53                 |
| 48                 | 20                | 10                  | 23                 |
| 19                 | 19                | 21                  | 8                  |
| 41                 | 47                | 13                  | 6                  |
| 10                 | 0                 | 10                  | 2                  |
| 53                 | 5                 | 40                  | 8                  |

| Fig S2                | PI for peppermint odor |  |
|-----------------------|------------------------|--|
| before<br>devaluation | after<br>devaluation   |  |
| 55.55555556           | 22.22222222            |  |
| 7.8125                | 60.86956522            |  |
| 9.090909091           | 66.66666667            |  |
| 65.38461538           | 33.33333333            |  |
| 15.55555556           | 7.407407407            |  |
| 29.03225806           | 37.5                   |  |
| 29.03225806           | 15.78947368            |  |
| 40                    | 30                     |  |
| 26.66666667           | 0                      |  |
| 46.875                | 19.04761905            |  |
| 0                     | 0                      |  |
| 35.29411765           | 33.33333333            |  |
| 13.04347826           | 0                      |  |
| 34.88372093           | 63.63636364            |  |
| 53.33333333           | 31.25                  |  |
| 36.92307692           | 16.66666667            |  |
| 27.86885246           | 28.57142857            |  |
| 47.5                  | 41.17647059            |  |
| 40                    | 21.42857143            |  |

Fig.S3a PI for rewarded odor (%)

| control before | control after | Devalued before | Devalued after |
|----------------|---------------|-----------------|----------------|
| 18.75          | 74.41860465   | 42.10526316     | 61.81818182    |
| 25             | 100           | 100             | 30.43478261    |
| 33.33333333    | 62.16216216   | 27.77777778     | 66.66666667    |
| 6.666666667    | 45.09803922   | 70              | 0              |
| 28.57142857    | 97.72727273   | 33.33333333     | 75.67567568    |
| 35.71428571    | 60            | 28.26086957     | 100            |
| 46.42857143    | 84.30232558   | 62.5            | 26.66666667    |
| 68.18181818    | 100           | 20              | 78.26086957    |
| 20.68965517    | 45.05494505   | 30              | 5.263157895    |
| 33.33333333    | 80.32786885   | 8.333333333     | 7.142857143    |
| 7.692307692    | 0             | 41.66666667     | 29.41176471    |
| 75             | 100           | 82.02247191     | 35.29411765    |
| 12.5           | 43.58974359   | 35              | 41.66666667    |
| 36.36363636    | 50.84745763   | 45.16129032     | 30.76923077    |
| 36.95652174    | 100           | 0               | 2.362204724    |
| 34.7826087     | 27.02702703   | 50              | 39.13043478    |
| 63.63636364    | 75            | 50              | 20.51282051    |
| 43.47826087    | 84.61538462   | 56              | 50             |
| 37.14285714    | 100           | 41.30434783     | 33.33333333    |
| 48.8372093     | 68            | 40              | 40             |
| 22.72727273    | 76.19047619   | 52.27272727     | 23.52941176    |
| 46.51162791    | 71.42857143   | 59.25925926     | 7.692307692    |
|                |               | 52.63157895     | 0              |
|                |               | 25              | 80             |
|                |               | 27.27272727     | 72.72727273    |

Fig.S3b

PI for rewarded odor (%)

| Control before | Control after | Devalued before | Devalued after |
|----------------|---------------|-----------------|----------------|
| 0              | 54.54545455   | 85.71428571     | 58.33333333    |
| 37.5           | 86.2745098    | 48.14814815     | 72.72727273    |
| 30.6122449     | 68.25396825   | 55.55555556     | 35.29411765    |
| 32.55813953    | 52.63157895   | 0               | 37.5           |
| 9.523809524    | 53.65853659   | 3.703703704     | 55.55555556    |
| 9.523809524    | 46.15384615   | 5.970149254     | 40             |
| 15.625         | 79.31034483   | 14.28571429     | 41.66666667    |
| 8.333333333    | 73.33333333   | 10              | 12.5           |
| 20             | 60.46511628   | 30.76923077     | 27.27272727    |
| 61.53846154    | 62.5          | 9.090909091     | 43.58974359    |
| 10             | 100           | 7.142857143     | 27.27272727    |
| 81.25          | 55.55555556   | 39.13043478     | 77.27272727    |
| 0              | 94.44444444   | 78.08219178     | 53.06122449    |
| 15.78947368    | 51.28205128   | 63.29113924     | 51.61290323    |
| 20.68965517    | 62.79069767   | 40              | 35.71428571    |
| 0              | 30.39215686   | 27.63157895     | 60             |
| 59.52380952    | 66.66666667   | 63.63636364     | 66.66666667    |
| 50             | 48.7804878    | 35.29411765     | 33.33333333    |
| 46.15384615    | 65.625        | 16.66666667     | 31.25          |
| 32.55813953    | 53.78151261   | 11.36363636     | 36.73469388    |
| 40.90909091    | 48.71794872   | 0               | 75             |
| 41.46341463    | 37.11340206   | 77.20588235     | 58.82352941    |
|                |               | 0               | 23.07692308    |
|                |               | 45.45454545     | 45.45454545    |



Fig.S4a

PI for rewarded odor (%)

| saline before | saline after | Epinastine before | Epinastine after |
|---------------|--------------|-------------------|------------------|
| 81.08108108   | 70           | 44.73684211       | 63.88888889      |
| 0             | 83.33333333  | 0                 | 68.42105263      |
| 90            | 100          | 72.22222222       | 40               |
| 30            | 50           | 30.76923077       | 54.54545455      |
| 63.04347826   | 94.11764706  | 61.53846154       | 45.45454545      |
| 72.72727273   | 70.58823529  | 52.38095238       | 22.22222222      |
| 61.11111111   | 62.5         | 67.64705882       | 78.125           |
| 68.18181818   | 72.72727273  | 54.16666667       | 53.57142857      |
| 50            | 100          | 77.77777778       | 68.75            |
| 41.17647059   | 40           | 6.66666667        | 68.18181818      |
| 0             | 50           | 56.52173913       | 50               |
| 86.20689655   | 62.5         | 10.52631579       | 67.34693878      |
| 50            | 28.57142857  | 50                | 43.47826087      |
| 37.5          | 50           | 21.42857143       | 68.75            |
| 58.49056604   | 100          | 60                | 43.75            |
| 35.71428571   | 60           | 60.46511628       | 90.90909091      |
| 37.5          | 41.66666667  | 66.66666667       | 54.54545455      |
| 28.57142857   | 100          | 66.66666667       | 54.54545455      |
| 60.71428571   | 80.35714286  | 60                | 42.85714286      |
| 75            | 66.66666667  | 36.36363636       | 56.25            |
| 50            | 100          | 82.60869565       | 44.44444444      |
| NA            | NA           | 33.33333333       | 23.52941176      |
| NA            | NA           | 58.33333333       | 45.45454545      |
| NA            | NA           | 44.44444444       | 81.81818182      |
| NA            | NA           | 50                | 59.375           |

Fig.S4b PI for rewarded odor (%)

| saline<br>before | saline<br>after | epinastine<br>before | epinastine<br>afer |
|------------------|-----------------|----------------------|--------------------|
| 61.76            | 60.87           | 100                  | 71.428571          |
| 42.86            | 56.76           | 53.333333            | 50                 |
| 62.86            | 42.35           | 45.454545            | 46.666667          |
| 69.23            | 57.14           | 63.636364            | 27.272727          |
| 57.69            | 58.82           | 50                   | 50                 |
| 32.35            | 52.38           | 42.857143            | 76.923077          |
| 50.00            | 76.00           | 45.454545            | 100                |
| 38.64            | 59.62           | 31.818182            | 52.173913          |
| 60.61            | 37.50           | 82.608696            | 89.393939          |
| 41.67            | 50.00           | 30.769231            | 26.190476          |
| 50.00            | 88.24           | 66.666667            | 75                 |
| 58.33            | 75.68           | 0                    | 38.461538          |
| 40.54            | 71.43           | 68.965517            | 37.5               |
| 38.71            | 56.90           | 30.30303             | 78.571429          |
| 52.38            | 93.10           | 39.393939            | 60                 |
| 32.69            | 88.00           | 43.589744            | 12.5               |
| 45.45            | 73.33           | 56                   | 84.444444          |
| 37.50            | 75.00           |                      |                    |
| 38.89            | 61.70           |                      |                    |
| 66.67            | 55.00           |                      |                    |
| 57.89            | 62.75           |                      |                    |
